# Supplementary material for: Unraveling the energetic significance of chemical events in enzyme catalysis via machine-learning based regression approach
Source: PubMed Central journal article supplement (PMC9814854; doi:10.1038/s42004-020-00379-w), 2020-10-08
Supplement: 42004_2020_379_MOESM2_ESM.pdf [file 42004_2020_379_MOESM2_ESM.pdf]

## **Description of Additional Supplementary Files**

File Name: Supplementary Data 1

Description: The pathways coordinates are named by "ID/state", e.g., "path\_0\_r.cor" is the coordinate file for pathway 0 which is sampled from the reactant QM state. All the pathway coordinate files share the same protein structure file, path.psf.
